# Supplementary material for: The Positive Association between Melatonin-Containing Food Consumption and Older Adult Life Satisfaction, Psychoemotional State, and Cognitive Function
Source: MDPI journal article supplement (doi:10.3390/nu16071064), 2024-04-05
Supplement: s1 [file s1]

Supplementary Materials

Table S1. Descriptive statistics of FMT<sub>day</sub> and FMT<sub>dinner</sub>.

| Variables             | Tertiles   | <i>M</i> | <i>SD</i> | <i>Min</i> | <i>Max</i> |
|-----------------------|------------|----------|-----------|------------|------------|
| FMT <sub>day</sub>    | 1 (Low)    | 360.37   | 189.07    | 30.41      | 691.45     |
|                       | 2 (Middle) | 1097.70  | 287.45    | 696.22     | 1699.48    |
|                       | 3 (High)   | 4269.33  | 3259.45   | 1708.87    | 23058.22   |
| FMT <sub>dinner</sub> | 1 (Low)    | 50.26    | 29.26     | 1.32       | 103.62     |
|                       | 2 (Middle) | 237.90   | 88.58     | 106.08     | 427.29     |
|                       | 3 (High)   | 1741.15  | 2295.27   | 428.72     | 20184.06   |
